# Supplementary material for: Metagenomic sequencing for investigation of a national keratoconjunctivitis outbreak, Israel, 2022
Source: PubMed Central journal article supplement (PMC10401915; doi:10.2807/1560-7917.es.2023.28.31.2300010), 2023-08-03
Supplement: 23-00010_MORAN-GILLAD_Supplement.pdf [file 23-00010_MORAN-GILLAD_Supplement.pdf]

## Supplementary materials

This supplementary material is hosted by *Eurosurveillance* as supporting information alongside the article [**Metagenomic sequencing for investigation of a national keratoconjunctivitis outbreak**], on behalf of the authors, who remain responsible for the accuracy and appropriateness of the content. The same standards for ethics, copyright, attributions and permissions as for the article apply. Supplements are not edited by *Eurosurveillance* and the journal is not responsible for the maintenance of any links or email addresses provided therein

**Table S1:** Taxonomic assignments of mNGS reads using kraken2 with the Standard-8 database.

| <b>Taxonomic assignment</b> | <b>taxid</b> | <b>Number of reads</b> | <b>Proportion (%)</b> |
|-----------------------------|--------------|------------------------|-----------------------|
| Eukaryota                   | 2759         | 111,155,869            | 86.12                 |
| Bacteria                    | 2            | 11,903                 | 0.01                  |
| Viruses                     | 10239        | 6,357                  | 0                     |
| Archaea                     | 2157         | 183                    | 0                     |
| unclassified                |              | 17,899,998             | 13.87                 |
| <b>Total (fwd and rev)</b>  |              | <b>129,074,310</b>     | <b>100.00</b>         |

**Table S2:** The most abundant taxonomic assignments of host (human)-removed mNGS reads using kraken2 with the Virus database

| <b>Taxonomic assignment</b>           | <b>taxid</b> | <b>Number of reads</b> | <b>Proportion of total reads (%)</b> |
|---------------------------------------|--------------|------------------------|--------------------------------------|
| BeAn 58058 virus                      | 67082        | 13,419                 | 0.36                                 |
| Human endogenous retrovirus K         | 45617        | 3,568                  | 0.1                                  |
| Salmonella phage vB_SenS_BPS1         | 2801546      | 1,288                  | 0.03                                 |
| Tequatrovirus kaw                     | 2844208      | 1,246                  | 0.03                                 |
| Simbu orthobunyavirus                 | 35306        | 1,056                  | 0.03                                 |
| Choristoneura fumiferana granulovirus | 56947        | 858                    | 0.02                                 |
| Others                                | ---          | 202                    | 0.01                                 |
| Unclassified                          | ---          | 3,664,671              | 99.41                                |
| <b>Total</b>                          | ---          | <b>3,686,308</b>       | <b>100</b>                           |

**Table S3:** The most abundant taxonomic assignments of host (human)-removed mNGS reads using kraken2 with the EuPathDB46 database

| <b>Taxonomic assignment</b>    | <b>taxid</b> | <b>Number of reads</b> | <b>Proportion of Total reads (%)</b> | <b>Proportion of Assigned reads (%)</b> |
|--------------------------------|--------------|------------------------|--------------------------------------|-----------------------------------------|
| <i>Vittaforma corneae</i>      | 42399        | 34,665                 | 0.94                                 | 96.57                                   |
| <i>Enterocytozoon bieneusi</i> | 31281        | 156                    | 0.004                                | 0.44                                    |
| <i>Enterospora canceri</i>     | 1081671      | 89                     | 0.002                                | 0.25                                    |
| <i>Nematocida displodere</i>   | 1805483      | 84                     | 0.002                                | 0.23                                    |
| <i>Nosema ceranae</i>          | 40302        | 67                     | 0.002                                | 0.19                                    |
| Others                         | ---          | 834                    | 0.023                                | 2.32                                    |
| Unclassified                   | ---          | 3,650,413              | 99.026                               |                                         |
| <b>Total</b>                   | ---          | <b>3,686,308</b>       | <b>100</b>                           |                                         |

**Table S4:** Top matching megaBLAST results for deconvoluted amplicons derived from a PCR-positive environmental sample.

| <b>Amplicon</b>     | <b>Taxon</b>              | <b>Total score</b> | <b>Query coverage (%)</b> | <b>E-value</b> | <b>Identity (%)</b> | <b>Accession</b>  |
|---------------------|---------------------------|--------------------|---------------------------|----------------|---------------------|-------------------|
| <b>env-Alt1-amp</b> | <i>Vittaforma corneae</i> | 370                | 100                       | 5.00E-98       | 96.43               | <u>MH333251.1</u> |
| <b>env-Alt2-amp</b> | <i>Microsporidium</i> sp. | 387                | 100                       | 5.00E-103      | 97.77               | <u>MF374898.1</u> |

**Table S5:** Taxonomic assignments of long sequence reads at domain/kingdom level using kraken2 with the Standard-8 database.

| <b>Taxonomic assignment</b> | <b>taxid</b> | <b>Number of<br/>reads</b> | <b>Proportion<br/>(%)</b> |
|-----------------------------|--------------|----------------------------|---------------------------|
| Bacteria                    | 2            | 439,688                    | 30.78                     |
| Eukaryota                   | 2759         | 67,335                     | 4.71                      |
| Archaea                     | 2157         | 2,693                      | 0.19                      |
| Viruses                     | 10239        | 384                        | 0.03                      |
| Unclassified                |              | 918,464                    | 64.29                     |
| <b>Total reads</b>          |              | <b>1,428,564</b>           | <b>100</b>                |

**Table S6:** Taxonomic assignments at the phylum level of long reads using kraken2 with the EuPathDB46 database

| <b>Taxonomic assignment</b> | <b>taxid</b> | <b>Number of reads</b> | <b>Proportion (%)</b> |
|-----------------------------|--------------|------------------------|-----------------------|
| Ascomycota                  | 4890         | 5,459                  | 0.38                  |
| Discosea                    | 555280       | 1,943                  | 0.14                  |
| Apicomplexa                 | 5794         | 1,874                  | 0.13                  |
| Euglenozoa                  | 33682        | 915                    | 0.06                  |
| Basidiomycota               | 5204         | 838                    | 0.06                  |
| Mucoromycota                | 1913637      | 393                    | 0.03                  |
| Blastocladiomycota          | 451459       | 280                    | 0.02                  |
| <b>Microsporidia</b>        | <b>6029</b>  | <b>117</b>             | <b>0.01</b>           |
| Evosea                      | 2605435      | 77                     | 0.01                  |
| Chytridiomycota             | 4761         | 63                     | 0                     |
| Heterolobosea               | 5752         | 33                     | 0                     |
| Unclassified                |              | 1,416,572              | 99.16                 |
| <b>Total reads</b>          |              | <b>1,428,564</b>       | <b>100</b>            |

**Table S7:** Taxonomic assignments at the species level of long reads assigned to the phylum Microsporidia using kraken2 with the EuPathDB46 database

| <b>Taxonomic assignment</b>        | <b>taxid</b> | <b>Number of reads</b> |
|------------------------------------|--------------|------------------------|
| <i>Mitosporidium daphniae</i>      | 1485682      | 22                     |
| <i>Amphiamblys sp. WSBS2006</i>    | 1866961      | 18                     |
| <i>Hamiltosporidium</i>            |              |                        |
| <i>tvaerminnensis</i>              | 1176355      | 8                      |
| <i>Anncaliia algerae</i>           | 723287       | 6                      |
| <i>Pseudoloma neurophilia</i>      | 146866       | 5                      |
| <i>Vavraia culicis</i>             | 103449       | 4                      |
| <i>Hepatospora eriocheir</i>       | 1081669      | 3                      |
| <i>Trachipleistophora hominis</i>  | 72359        | 3                      |
| <b><i>Vittaforma corneae</i></b>   | <b>42399</b> | <b>3</b>               |
| <i>Ordospora colligata</i>         | 174685       | 3                      |
| <i>Spraguea lophii</i>             | 51541        | 3                      |
| <i>Nosema ceranae</i>              | 40302        | 3                      |
| <i>Nosema bombycis</i>             | 27978        | 3                      |
| <i>Edhazardia aedis</i>            | 70536        | 2                      |
| <i>Enterocytozoon hepatopenaei</i> | 646526       | 2                      |
| <i>Enterospora canceri</i>         | 1081671      | 2                      |
| <i>Nematocida displodere</i>       | 1805483      | 2                      |



|                                     |       |                  |
|-------------------------------------|-------|------------------|
| <i>Encephalitozoon cuniculi</i>     | 6035  | 1                |
| <i>Enterocytozoon bieneusi</i>      | 31281 | 1                |
| <i>Encephalitozoon intestinalis</i> | 58839 | 1                |
| <b>Total reads</b>                  |       | <b>1,428,564</b> |

**Table S8:** Taxonomic assignments of long sequence reads using kraken2 with the Virus database

| <b>Taxonomic assignment</b>           | <b>taxid</b> | <b>Number of reads</b> | <b>Proportion (%)</b> |
|---------------------------------------|--------------|------------------------|-----------------------|
| Lambdavirus lambda                    | 10710        | 10,272                 | 0.72                  |
| Lambdavirus HK630                     | 2169969      | 589                    | 0.04                  |
| Lambdavirus HK629                     | 2169968      | 367                    | 0.03                  |
| Eptesicus fuscus gammaherpesvirus     | 2035399      | 267                    | 0.02                  |
| Escherichia virus DE3                 | 2169967      | 221                    | 0.02                  |
| Pandoravirus salinus                  | 1349410      | 179                    | 0.01                  |
| Pandoravirus neocaledonia             | 2107708      | 141                    | 0.01                  |
| Pandoravirus inopinatum               | 1605721      | 102                    | 0.01                  |
| Polybotosvirus Atuph07                | 2560286      | 101                    | 0.01                  |
| Pandoravirus macleodensis             | 2107707      | 96                     | 0.01                  |
| Choristoneura fumiferana granulovirus | 56947        | 92                     | 0.01                  |
| Erskinevirus asesino                  | 2169882      | 88                     | 0.01                  |
| Pandoravirus dulcis                   | 1349409      | 74                     | 0.01                  |
| Efbeekayvirus P184                    | 2955844      | 71                     | 0.01                  |
| Synechococcus phage S-SRM01           | 2781608      | 71                     | 0.01                  |
| Pandoravirus quercus                  | 2107709      | 70                     | 0.01                  |
| Pseudomonas phage YMC12/01/R24        | 2283028      | 61                     | 0                     |
| Bertelyvirus BL9                      | 2734192      | 57                     | 0                     |

|                                                    |         |                  |            |
|----------------------------------------------------|---------|------------------|------------|
| Megavirus chiliensis                               | 1094892 | 55               | 0          |
| Menderavirus mendera                               | 2846389 | 53               | 0          |
| Moonbeamvirus moonbeam                             | 2560334 | 52               | 0          |
| Haifavirus tim68                                   | 2955972 | 52               | 0          |
| Heterosigma akashiwo virus 01                      | 97195   | 48               | 0          |
| Synechococcus phage S-SZBM1                        | 2926475 | 46               | 0          |
| Spodoptera exigua multiple<br>nucleopolyhedrovirus | 10454   | 46               | 0          |
| Busanvirus ACP17                                   | 2560261 | 45               | 0          |
| Bronvirus silverleaf                               | 2955544 | 45               | 0          |
| Others (<1% of assigned reads)                     |         | 2614             | 0.18       |
| Unclassified                                       |         | 1,412,589        | 98.88      |
| <b>Total reads</b>                                 |         | <b>1,428,564</b> | <b>100</b> |

**Table S9:** Taxonomic assignments of long sequence reads using kraken2 with the Standard-8 database

| <b>Taxonomic assignment</b>         | <b>taxid</b> | <b>Number of reads</b> | <b>Proportion (%)</b> |
|-------------------------------------|--------------|------------------------|-----------------------|
| <i>Homo sapiens</i>                 | 9606         | 67,297                 | 4.71                  |
| <i>Escherichia coli</i>             | 562          | 17,114                 | 1.2                   |
| <i>Klebsiella quasipneumoniae</i>   | 1463165      | 1,660                  | 0.12                  |
| <i>Sulfuritalea hydrogenivorans</i> | 748811       | 1,326                  | 0.09                  |
| <i>Aeromonas veronii</i>            | 654          | 1,318                  | 0.09                  |
| <i>Rubrivivax gelatinosus</i>       | 28068        | 1,159                  | 0.08                  |
| <i>Rhizobacter sp. AJA081-3</i>     | 2753607      | 1,085                  | 0.08                  |
| <i>Ramlibacter tataouinensis</i>    | 94132        | 1,013                  | 0.07                  |
| <i>Sulfuricaulis limicola</i>       | 1620215      | 996                    | 0.07                  |
| <i>Rheinheimera sp. F8</i>          | 1763998      | 995                    | 0.07                  |
| <i>Luteolibacter sp. SL250</i>      | 2995170      | 917                    | 0.06                  |
| <i>Inhella inkyongensis</i>         | 392593       | 894                    | 0.06                  |
| <i>Aquincola tertiaricarbonis</i>   | 391953       | 756                    | 0.05                  |
| <i>Limnobacter sp. SAORIC-580</i>   | 2732163      | 747                    | 0.05                  |
| <i>Variovorax paradoxus</i>         | 34073        | 739                    | 0.05                  |
| <i>Luteolibacter ambystomatis</i>   | 2824561      | 703                    | 0.05                  |
| <i>Salmonella enterica</i>          | 28901        | 630                    | 0.05                  |
| <i>Kinneretia sp. DAIF2</i>         | 2714952      | 629                    | 0.04                  |

|                                      |         |     |      |
|--------------------------------------|---------|-----|------|
| <i>Rheinheimera</i> sp. MM224        | 3019969 | 623 | 0.04 |
| <i>Pseudomonas</i> sp. SL4(2022)     | 2994661 | 610 | 0.04 |
| <i>Sphaerotilus</i> sp. FB-5         | 2914710 | 610 | 0.04 |
| <i>Limnohabitans</i> sp. 63ED37-2    | 1678128 | 591 | 0.04 |
| <i>Lacibacter</i> sp. S13-6-22       | 2760713 | 565 | 0.04 |
| <i>Leptothrix cholodnii</i>          | 34029   | 562 | 0.04 |
| <i>Pseudomonas alcaligenes</i>       | 43263   | 562 | 0.04 |
| <i>Citrobacter portucalensis</i>     | 1639133 | 561 | 0.04 |
| <i>Lacunisphaera limnophila</i>      | 1838286 | 518 | 0.04 |
| <i>Flavobacterium ammoniigenes</i>   | 1751095 | 517 | 0.04 |
| <i>Aquabacterium</i> sp. J223        | 2898431 | 506 | 0.04 |
| <i>Caldimonas thermodepolymerans</i> | 215580  | 480 | 0.03 |
| <i>Azospira restricta</i>            | 404405  | 473 | 0.03 |
| <i>Curvibacter</i> sp. AEP1-3        | 1844971 | 471 | 0.03 |
| <i>Sorangium cellulosum</i>          | 56      | 454 | 0.03 |
| <i>Hydrogenophaga</i> sp. SL48       | 2806347 | 446 | 0.03 |
| <i>Rheinheimera mangrovi</i>         | 2498451 | 444 | 0.03 |
| <i>Cupriavidus taiwanensis</i>       | 164546  | 438 | 0.03 |
| <i>Usitatibacter rugosus</i>         | 2732067 | 437 | 0.03 |
| <i>Usitatibacter palustris</i>       | 2732487 | 421 | 0.03 |

|                                       |         |     |      |
|---------------------------------------|---------|-----|------|
| <i>Qipengyuania soli</i>              | 2782568 | 419 | 0.03 |
| <i>Sphaerotilus sulfidivorans</i>     | 639200  | 407 | 0.03 |
| <i>Ilumatobacter coccineus</i>        | 467094  | 402 | 0.03 |
| <i>Stenotrophomonas maltophilia</i>   | 40324   | 401 | 0.03 |
| <i>Niveibacterium microcysteis</i>    | 2811415 | 401 | 0.03 |
| <i>Urbifossiella limnaea</i>          | 2528023 | 399 | 0.03 |
| <i>Tsuneonella dongtanensis</i>       | 692370  | 390 | 0.03 |
| <i>Candidatus Fonsibacter ubiquis</i> | 1925548 | 376 | 0.03 |
| <i>Cupriavidus pauculus</i>           | 82633   | 370 | 0.03 |
| <i>Anaeromyxobacter sp. Fw109-5</i>   | 404589  | 362 | 0.03 |
| <i>Ideonella dechloratans</i>         | 36863   | 362 | 0.03 |
| <i>Cylindrospermopsis raciborskii</i> | 77022   | 359 | 0.03 |
| <i>Luteitalea sp. TBR-22</i>          | 2802971 | 356 | 0.03 |
| <i>Variovorax sp. HW608</i>           | 1034889 | 352 | 0.03 |
| <i>Ferribacterium limneticum</i>      | 76259   | 350 | 0.03 |
| <i>Anaeromyxobacter oryzae</i>        | 2918170 | 349 | 0.02 |
| <i>Shewanella oneidensis</i>          | 70863   | 346 | 0.02 |
| <i>Opitutus sp. GAS368</i>            | 1882749 | 345 | 0.02 |

|                                          |         |                  |            |
|------------------------------------------|---------|------------------|------------|
| <i>Chitinimonas koreensis</i>            | 356302  | 345              | 0.02       |
| <i>Sandaracinus amylolyticus</i>         | 927083  | 343              | 0.02       |
| <i>Pseudomonas putida</i>                | 303     | 335              | 0.02       |
| <i>Streptomyces venezuelae</i>           | 54571   | 333              | 0.02       |
| <i>Luteolibacter luteus</i>              | 2728835 | 327              | 0.02       |
| <i>Erythrobacter sp. SDW2</i>            | 2907154 | 323              | 0.02       |
| <i>Microcystis aeruginosa</i>            | 1126    | 323              | 0.02       |
| <i>Hydrogenophaga<br/>taeniospiralis</i> | 65656   | 322              | 0.02       |
| <i>Rhizobacter gummiphilus</i>           | 946333  | 317              | 0.02       |
| Others (<1% of assigned<br>reads)        |         | 8,437            | 0.6        |
| Unclassified                             |         | 1,300,146        | 91.01      |
| <b>Total reads</b>                       |         | <b>1,428,564</b> | <b>100</b> |

**Table S10:** Strain-level comparison of host-removed short reads from the clinical metagenome to either *V. corneae* ATCC 50505 genome or an environmental 6kb *V. corneae* long read.

| Variable                       | Contig JH370142.1<br>of ATCC 50505 | Environmental 6kb<br>long read |
|--------------------------------|------------------------------------|--------------------------------|
| Total length                   | 30,001                             | 6,671                          |
| Bases covered by<br>reads      | 2,239                              | 6,598                          |
| Bases of total<br>mapped reads | 59,129                             | 399,642                        |
| Breadth of<br>coverage (%)     | 7.46%                              | 98.91%                         |
| Mean depth of<br>coverage      | 1.97                               | 59.91                          |



**Figure S1. Number of *V. corneae* reads identified in publicly available Sea of Galilee MGx samples.** Number of *V. corneae* reads identified in 61 publicly available Sea of Galilee MGx samples (from bioprojects PRJNA488159, PRJNA497963, and PRJNA637457) using kraken2 with the EuPathDB46 database.

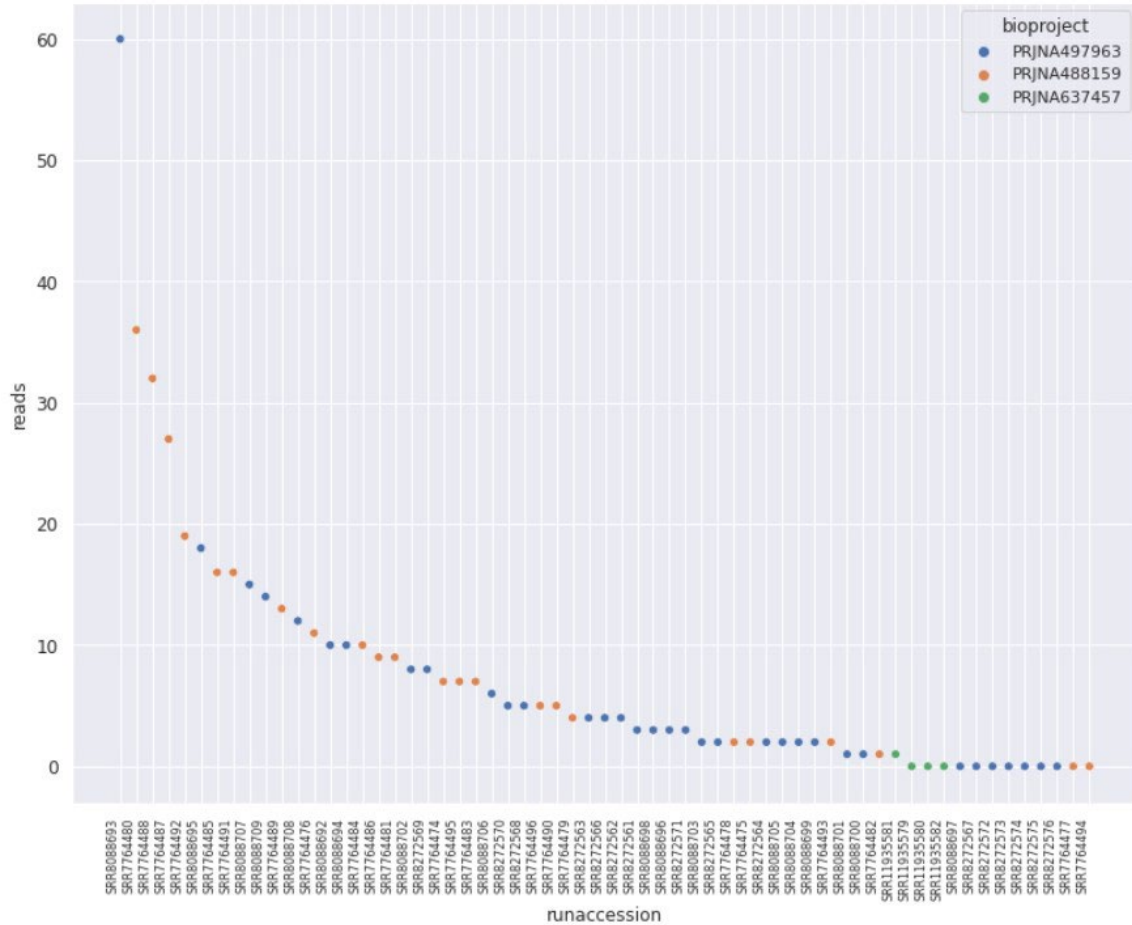

**Figure S2. Detection and characterisation of *V. corneae* reads from historical samples.**

For each of the top four abundant metagenomic samples (SRR8088693, SRR7764488, SRR7764487, and SRR7764492), mapping of the reads to the MAG derived from clinical sample, provided a consensus sequence of the respective SSU. When aligned to the *in silico* predicted real time PCR amplicons (including the isolated MAG, reference genome and environmental sample), regions of variation were observed for all historical samples.

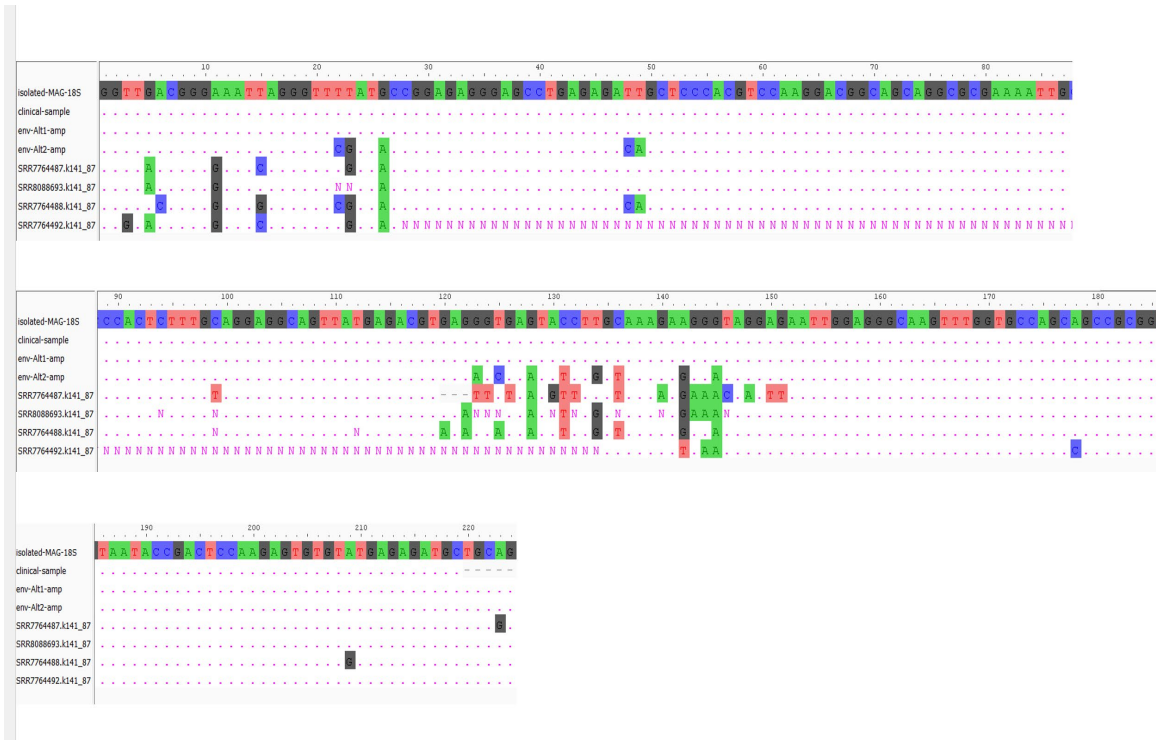

### **Supplementary protocol – real time PCR**

MAG-derived PCR protocol for *Vittaforma corneae* detection:

Forward primer: 5'-GGTTGACGGGAAATTAGGGT-3'

Reverse primer: 5'-CTGCAGCATCTCTCATACACAC-3'

Reaction mix: 5.5 µl water, 1.0 µl primers, 12.5 µl mastermix for a total of 19.0 µl

Template DNA: 6 µl

Total reaction volume: 25 µl

PCR conditions: hold 96.5°C – 60 sec; denaturation 95°C – 6 sec, primer annealing 56°C – 8 sec, extension 72°C – 24 sec; number of cycles: 40

Analysis – expected amplicon size 224 bp, melting curve analysis – 85.76°C ± 0.5°C

The PCR was performed on a Rotor-Gene instrument with negative controls using the KAPA SYBR FAST qPCR Master Mix (x2) (KAPABIOSYSTEMS, Boston, MA, USA).
